# Supplementary material
Source: PubMed Central journal article supplement (PMC3577139)

**A**

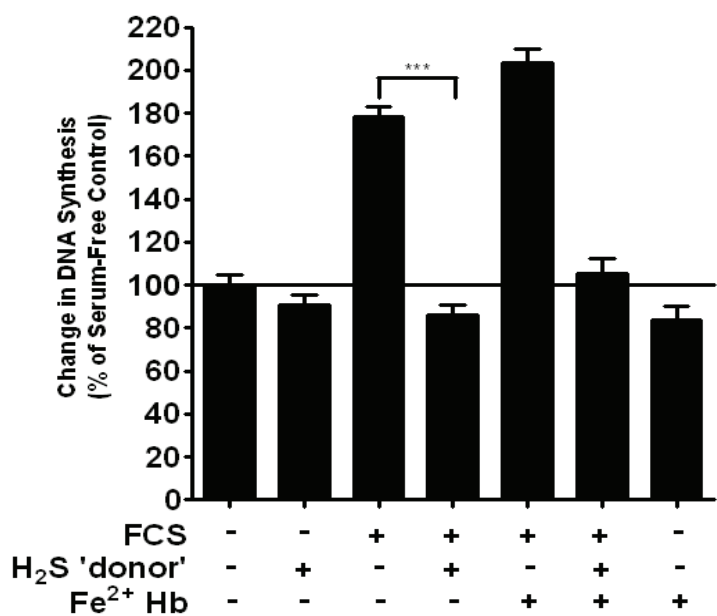

**B**

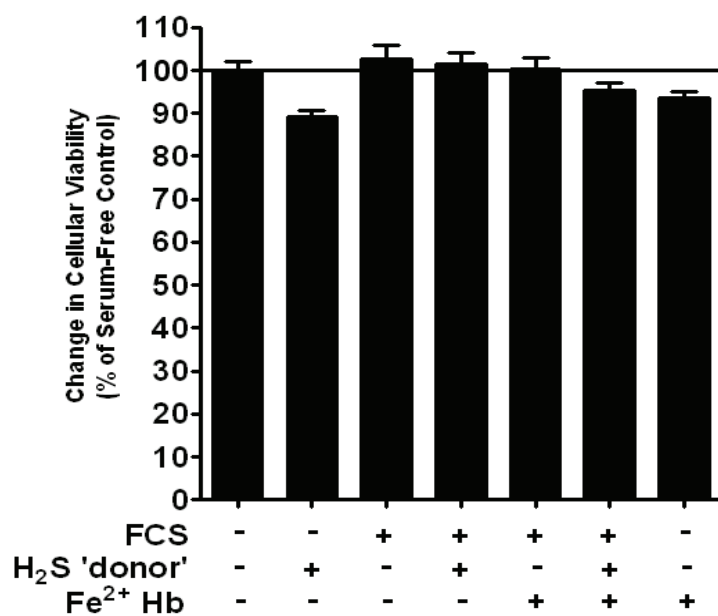

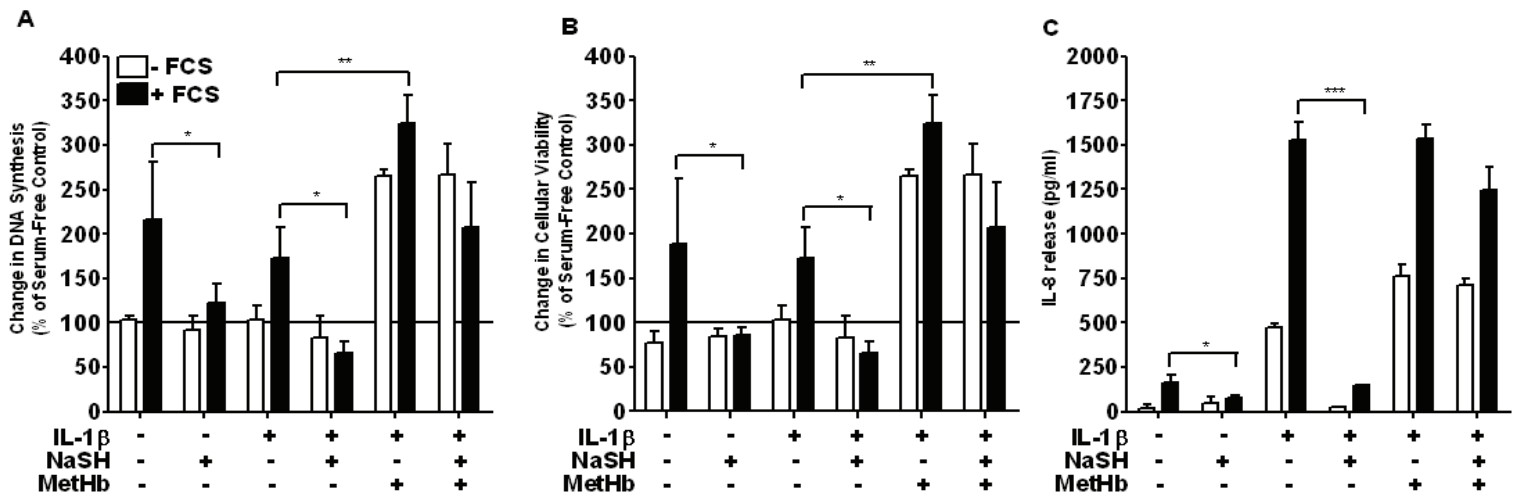

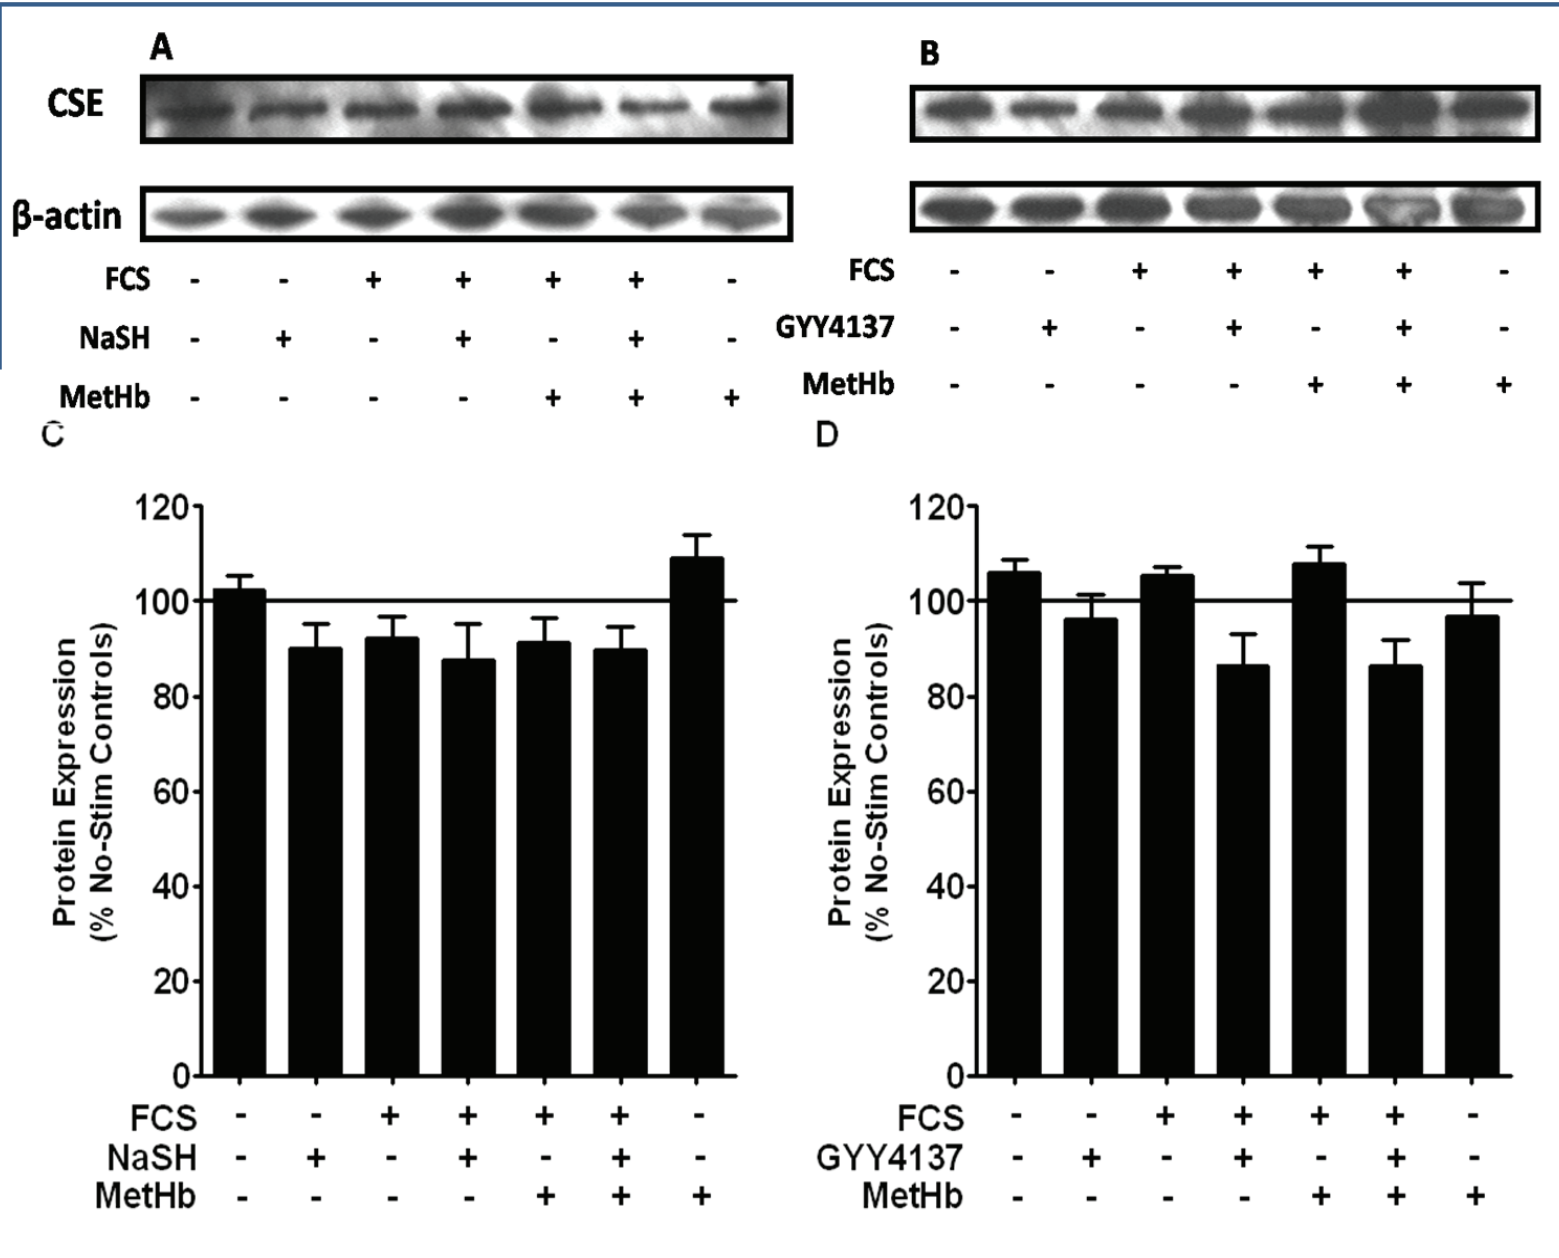

Supplement: NIHMS51757-supplement-suppl_figs.pdf [file NIHMS51757-supplement-suppl_figs.pdf]
